# Supplementary material for: Akt targeting as a strategy to boost chemotherapy efficacy in non-small cell lung cancer through metabolism suppression
Source: PubMed Central journal article supplement (PMC5362809; doi:10.1038/srep45136), 2017-03-23
Supplement: srep45136-s1.pdf [file srep45136-s1.pdf]

**Akt targeting as a strategy to boost chemotherapy efficacy in non-small cell lung cancer through metabolism suppression.**

Marion Le Grand<sup>1,2</sup>, Raphael Berges<sup>1</sup>, Eddy Pasquier<sup>1,3</sup>, Marie-Pierre Montero<sup>1</sup>, Laurence Borge<sup>4</sup>, Alice Carrier<sup>4</sup>, Sophie Vasseur<sup>4</sup>, Veronique Bourgarel<sup>1,5</sup>, Dujé Buric<sup>1</sup>, Nicolas André<sup>1,3,6</sup>, Diane Braguer<sup>1,5</sup> and Manon Carré<sup>1,\*</sup>.

<sup>1</sup> Aix-Marseille Université, Inserm UMR\_S 911, Centre de Recherche en Oncologie biologique et Oncopharmacologie, Faculté de pharmacie, Marseille, France

<sup>2</sup> Children's Cancer Institute Australia, Lowy Cancer Research Centre, University of New South Wales, Randwick, NSW, Australia

<sup>3</sup> Metronomics Global Health Initiative, Marseille, France

<sup>4</sup> Centre de Recherche en Cancérologie de Marseille (CRCM), Aix-Marseille Université, Inserm U1068, Institut Paoli-Calmettes, 13009 Marseille, France

<sup>5</sup> Assistance Publique – Hôpitaux de Marseille (AP-HM), Marseille, France

<sup>6</sup> Service d'Hématologie & Oncologie Pédiatrique, AP-HM, Marseille, France

\* to whom correspondence should be addressed:

Manon Carré, PhD

Centre de Recherche en Oncologie biologique et Oncopharmacologie

Faculté de Pharmacie

27 boulevard Jean Moulin

13385 Marseille Cedex 05

France

Phone number: 33 (0)4-91-83-56-26

Email: [manon.carre@univ-amu.fr](mailto:manon.carre@univ-amu.fr)

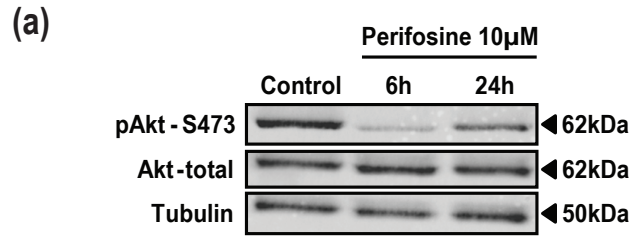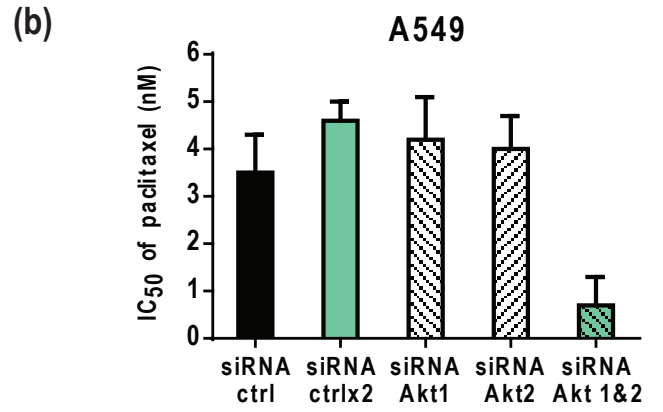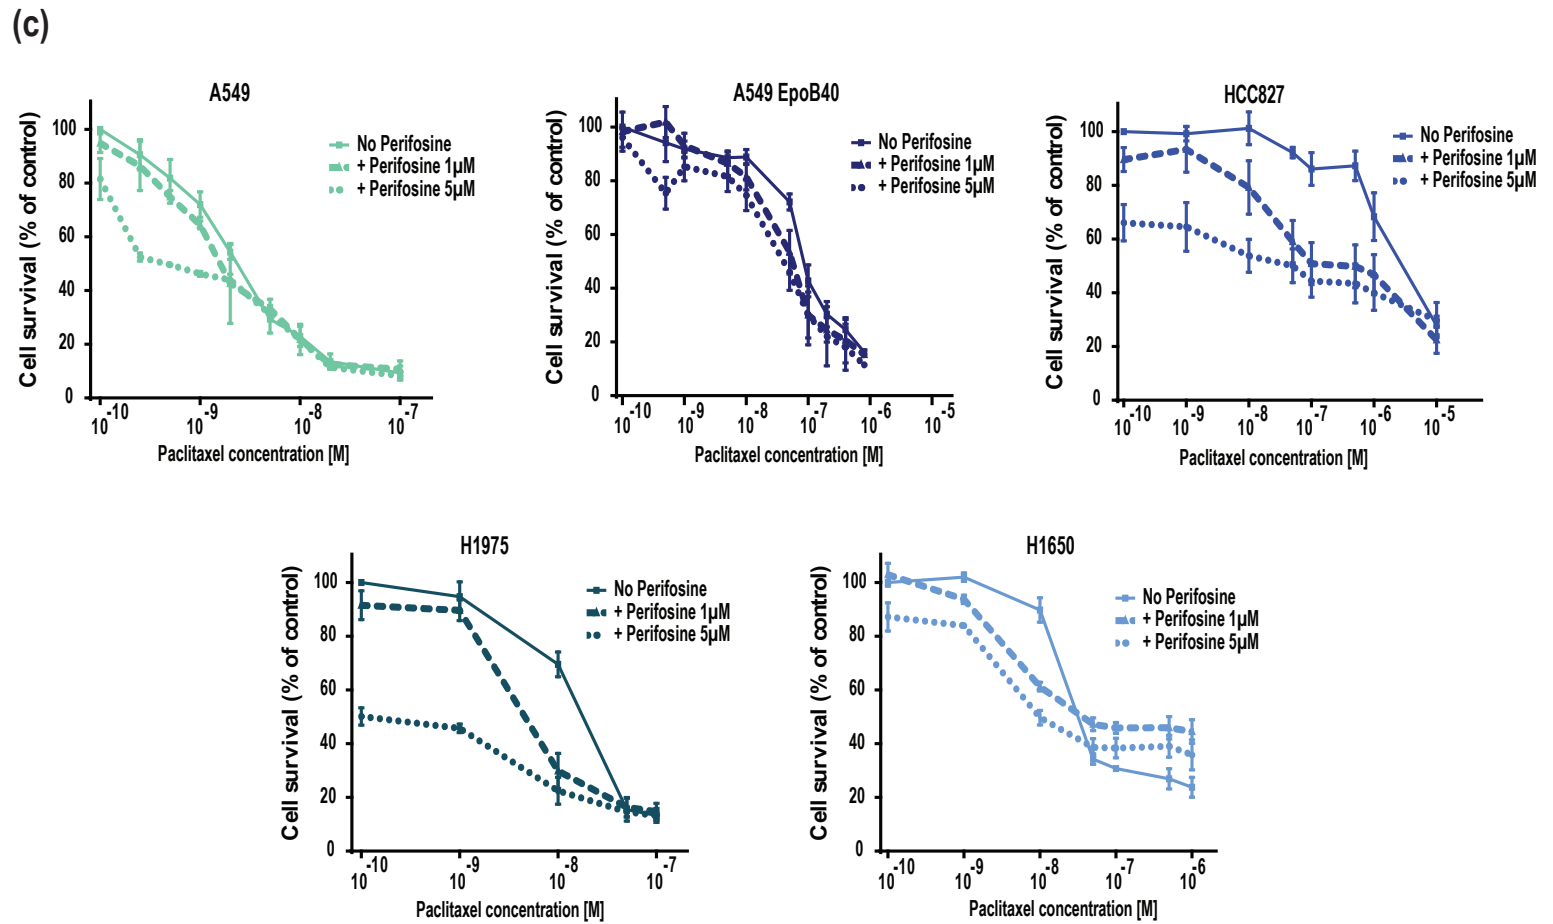

**Supplementary Figure 1:** (a) Levels of active pAkt-S473, Akt-total and tubulin in A549 cells after a 6 h and 24 h-treatment with 10  $\mu$ M perifosine. (b) IC<sub>50</sub> of paclitaxel in A549 cells transfected with a control siRNA, Akt1 or Akt2 siRNAs. (c) Cell survival after paclitaxel treatment alone or combined to perifosine 1 or 5  $\mu$ M in NSCLC cells. Mean  $\pm$  S.E.M of at least three independent experiments are shown.

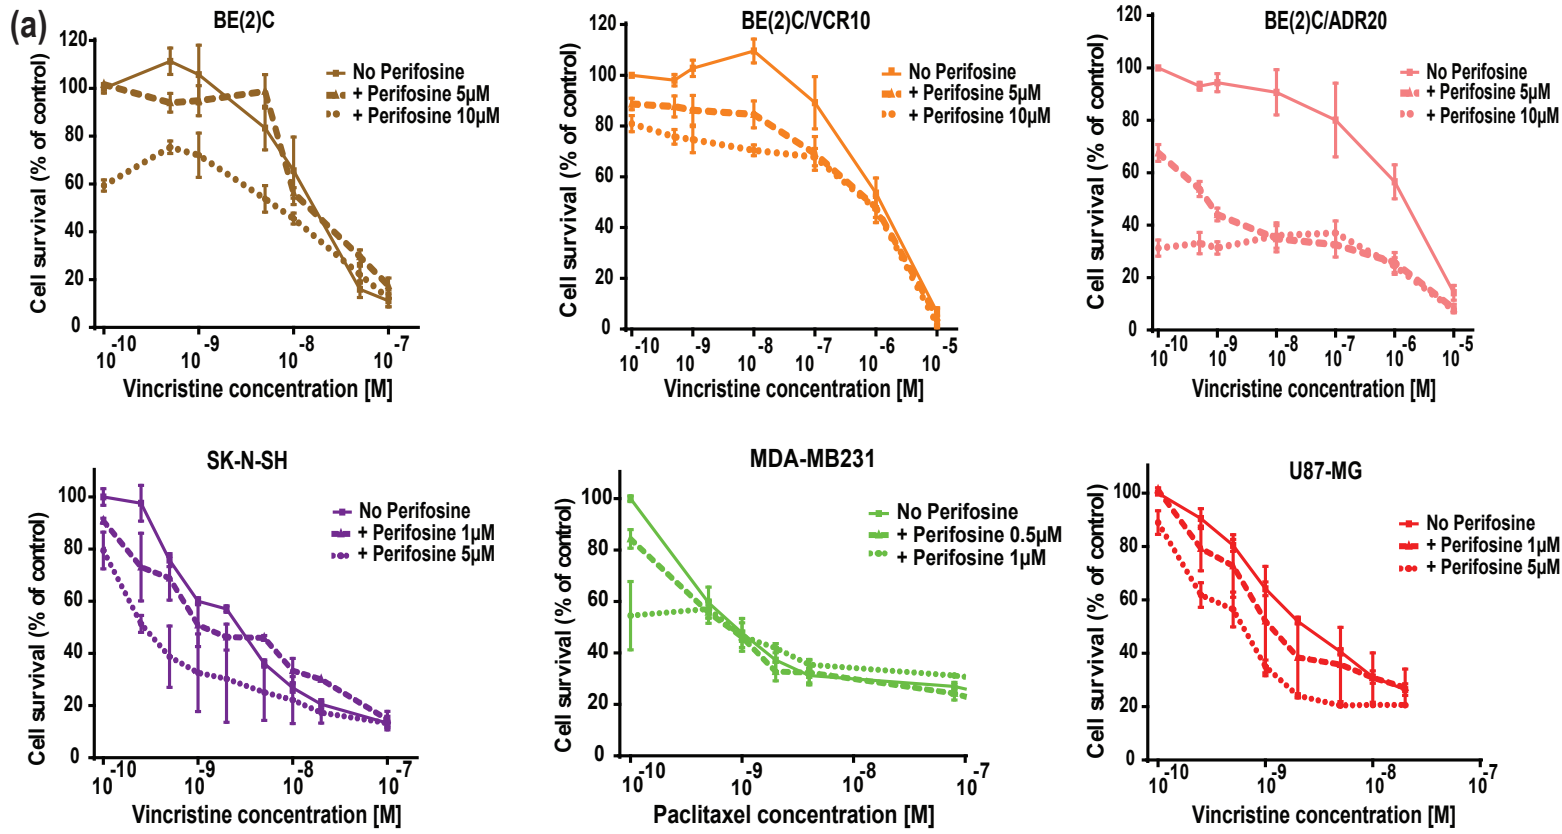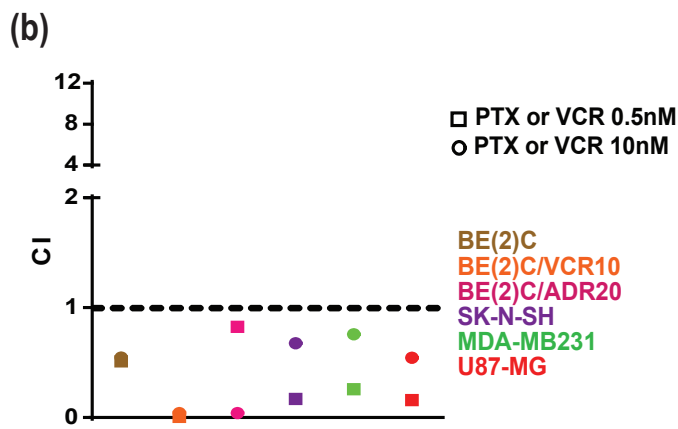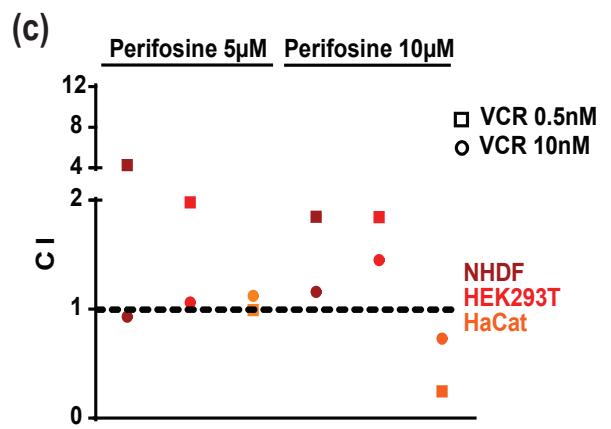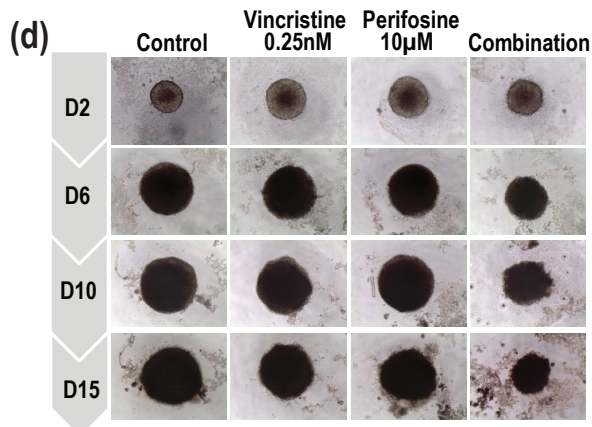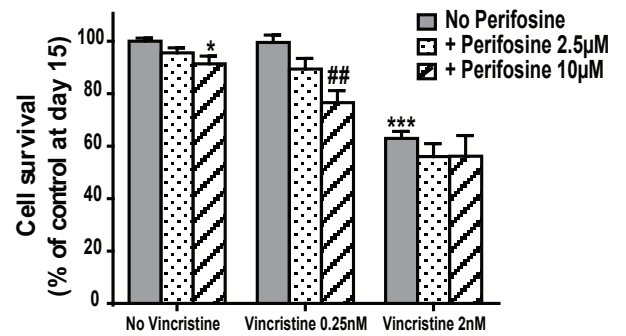

**Supplementary Figure 2:** (a) Cell survival after paclitaxel or vincristine treatment alone or combined to perifosine at indicated concentrations in different cancer cells. (b) Dot plot representation of the CI of paclitaxel or vincristine combined to perifosine 5  $\mu$ M in different cancer cells. (c) Dot plot representation of the CI of vincristine combined to perifosine in three human non-cancer cell types. (d) Representative pictures of U87-MG spheroids treated with vincristine and/or perifosine. Results were expressed as a percentage of growth in non-treated spheroids at day 15. Significant differences compared to no treatment condition (\*) or to vincristine treatment (#). Mean  $\pm$  S.E.M of at least three independent experiments are shown.

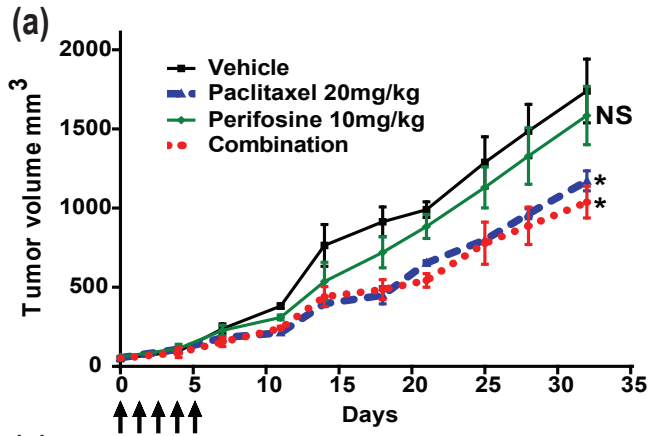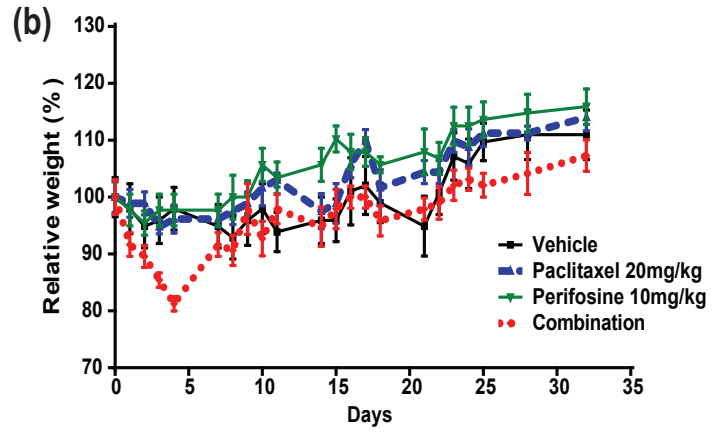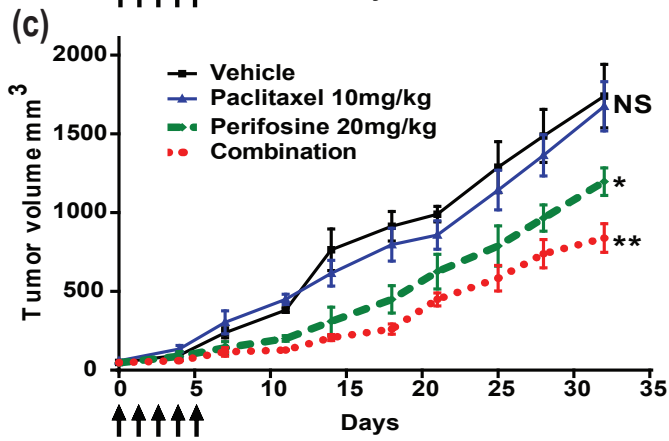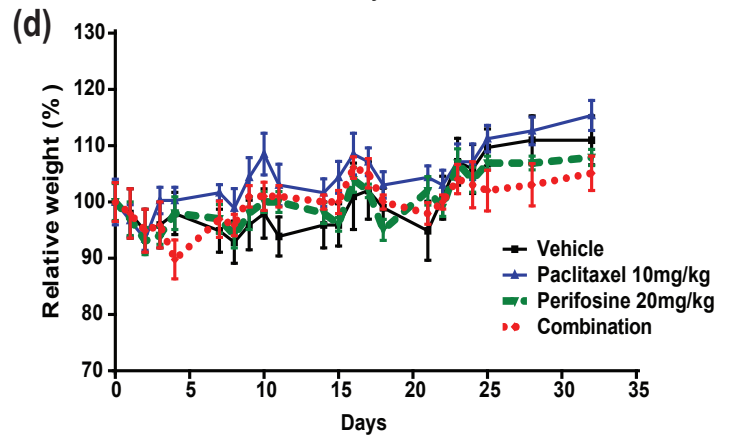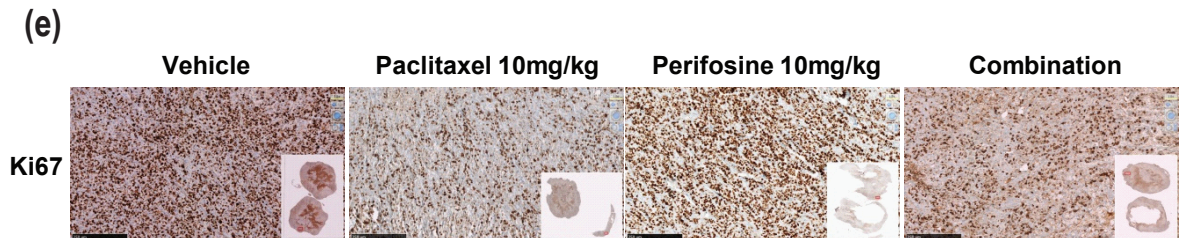

**Supplementary Figure 3:** Perifosine was administered by oral gavage 5 days/week throughout the study and paclitaxel was administered either once daily the first five days (n=5) (a-c). Significant differences compared to vehicle. (b-d) Weight of mice was determined. (e) Representative pictures of nuclear proliferation marker Ki67 antibody staining were shown (scale bars 250  $\mu\text{m}$ ).

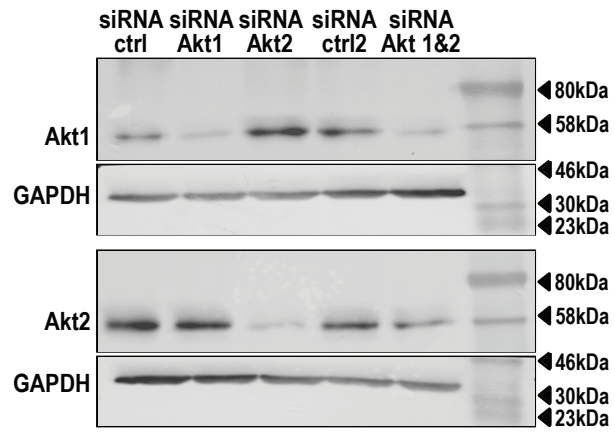



**Supplementary Figure 4:** Uncropped blots are presented with levels of Akt1, Akt2 and GAPDH in A549 cells transfected with a control siRNA, Akt1 or Akt2 siRNAs. Samples derive from the same experiment and blots are processed in parallel. Molecular size markers are represented by using ColorPlus Prestained Protein Marker broad range (7-175kDa; New England; BioLabs). Non-overexposure of luminescent signals was guaranteed by using the SynGene Software (saturation tools).

| Cell lines                                | Culture method                                                                                                     | Specifications                                                                      |
|-------------------------------------------|--------------------------------------------------------------------------------------------------------------------|-------------------------------------------------------------------------------------|
| A549<br>Non-small cell lung cancer        | RPMI-1640 medium<br>10 % fetal bovine serum<br>2 mM L-glutamine<br>1 % penicillin/streptomycin                     | EGFR <sup>wt</sup>                                                                  |
| A549/EpoB40<br>Non-small cell lung cancer | RPMI-1640 medium<br>10 % fetal bovine serum<br>2 mM L-glutamine<br>1 % penicillin/streptomycin<br>40 nM patupilone | EGFR <sup>wt</sup> ;<br>resistant cell line to paclitaxel derived from A549         |
| H1650<br>Non-small cell lung cancer       | RPMI-1640 medium<br>10 % fetal bovine serum<br>2 mM L-glutamine<br>1 % penicillin/streptomycin                     | EGFR DE746-A750 in exon 19                                                          |
| H1975<br>Non-small cell lung cancer       |                                                                                                                    | EGFR L858R in exon 21 and<br>T790M in exon 20 ;<br>resistant cell line to anti-EGFR |
| HCC827<br>Non-small cell lung cancer      |                                                                                                                    | EGFR DE746-A750 in exon 19;<br>resistant cell line to paclitaxel                    |
| MDA-MB231<br>Breast cancer                |                                                                                                                    |                                                                                     |
| SK-N-SH<br>Neuroblastoma                  |                                                                                                                    |                                                                                     |
| BE(2)C<br>Neuroblastoma                   | DMEM medium<br>10 % fetal bovine serum<br>2 mM L-glutamine                                                         |                                                                                     |
| BE(2)C/VCR10<br>Neuroblastoma             |                                                                                                                    | Resistant cell line to vincristine derived from BE(2)C)                             |
| BE(2)C/ADR20<br>Neuroblastoma             |                                                                                                                    | Resistant cell line to adriamycin derived from BE(2)C)                              |
| U87-MG<br>Glioblastoma                    | MEM medium<br>10 % fetal bovine serum<br>2 mM L-glutamine                                                          |                                                                                     |
| HEK293T<br>Epithelial embryonic kidney    | DMEM medium<br>10 % fetal bovine serum<br>2 mM L-glutamine<br>1 % non-essential amino acids                        | Non-cancer cell lines                                                               |
| NHDF<br>Normal dermal fibroblast          |                                                                                                                    |                                                                                     |
| HaCat<br>Human keratinocytes              |                                                                                                                    |                                                                                     |

**Supplementary table 1:** Cell line characteristics. All cell lines were routinely maintained in culture at 37°C and 5 % CO<sub>2</sub> and were regularly screened and are free from mycoplasma contamination.

Suppliers:

- Invitrogen, France: RPMI-1640, DMEM and MEM media
- Lonza, Levallois-Perret, France: L-glutamine FBM medium and FBS
- Sigma-Aldrich, Saint-Louis, MO, USA: penicillin/streptomycin and patupilone.

|             |  | Paclitaxel |       |            |            |
|-------------|--|------------|-------|------------|------------|
|             |  | 50nM       | 100nM |            |            |
| A549/EpoB40 |  | 0.333      | 0.313 | 1 $\mu$ M  | Perifosine |
|             |  | 1.002      | 0.723 | 5 $\mu$ M  |            |
|             |  | 0.738      | 0.297 | 10 $\mu$ M |            |

**Supplementary Table 2:** Combination indexes of perifosine and paclitaxel in A549/EpoB40 NSCLC cells. A color code is used to illustrate the different drug interactions: synergism (green) and additivity (grey).
